# Supplementary material
Source: PubMed Central journal article supplement (PMC3118040)

**Supplementary Figure 1:** Variable importance (VI) scores for the top 100 predictors for the Random Forests analysis. Gender, *HLA-SE* status, and multipoint identity-by-descent probabilities for 379 microsatellite markers, were used to predict *PTPN22* 1858T concordance in 292 affected sibling pairs. There is a clear distinction between the VI scores for the five top-ranking predictors compared to the remaining predictors.

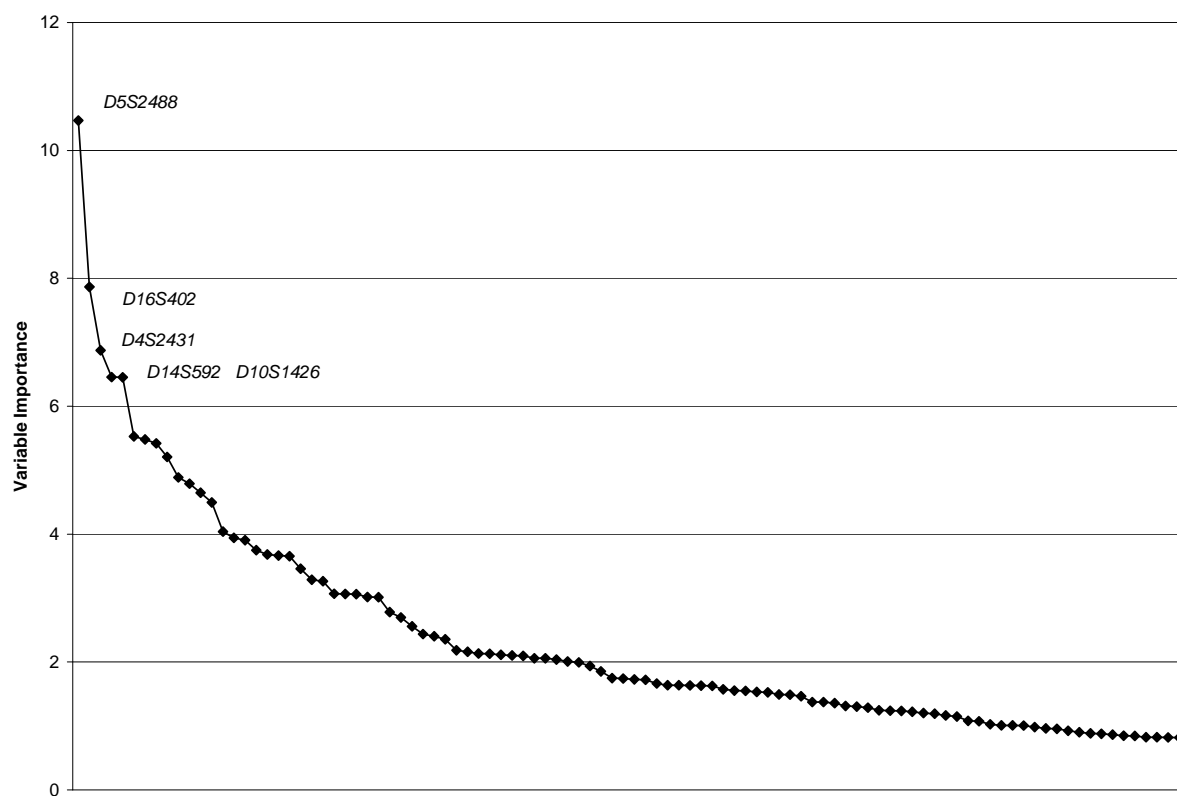

Supplement: NIHMS214790-supplement-supplement_1.pdf [file NIHMS214790-supplement-supplement_1.pdf]
